# Supplementary material for: UV LASER EXCITATION FOR ULTRASENSITIVE PHOTOLUMINESCENT DOSIMETRY.
Source: MDPI journal article supplement (doi:10.3390/md21040198), 1967-10-31
Supplement: s1 [file s1]

## Supplementary Information

### **Saturated and Polyunsaturated Fatty Acids Production by *Aurantiochytrium* sp. PKU#Mn4 on *Enteromorpha* Hydrolysate**

Yaodong He<sup>1,2†</sup>, Xingyu Zhu<sup>1,†</sup>, Yaodong Ning<sup>1</sup>, Xiaohong Chen<sup>1</sup>, Biswarup Sen<sup>1\*</sup>, Guangyi  
Wang<sup>1,3,4\*</sup>

<sup>1</sup>Center of Marine Environmental Ecology, School of Environmental Science and  
Engineering, Tianjin University, Tianjin 300072, China

<sup>2</sup>School of Fishery, Zhejiang Ocean University, Zhoushan 316022, China

<sup>3</sup>Key Laboratory of Systems Bioengineering (Ministry of Education), Tianjin University,  
Tianjin 300072, China

<sup>4</sup>Qingdao Institute for Ocean Technology of Tianjin University Co., Ltd., Qingdao 266237,  
China

†These authors contributed equally

\*Corresponding author

Email: bsen@tju.edu.cn

gywang@tju.edu.cn

**Table S1.** Composition of *Enteromorpha* hydrolysate medium.

| <i>Enteromorpha</i><br>(g) | Sterile distilled water<br>(mL) | 98% (w/v) H <sub>2</sub> SO <sub>4</sub><br>(mL) |
|----------------------------|---------------------------------|--------------------------------------------------|
| 40                         | 760                             | 8                                                |
| 60                         | 1140                            | 12                                               |
| 80                         | 1520                            | 16                                               |
| 100                        | 1900                            | 20                                               |
| 120                        | 2280                            | 24                                               |

**Table S2.** Fatty acid composition of lipids accumulated during the cultivation of PKU#Mn4 on different concentrations of *Enteromorpha* hydrolysate.

| Fatty acid | <i>Enteromorpha</i> hydrolysate (g/L) |              |              |              |              |
|------------|---------------------------------------|--------------|--------------|--------------|--------------|
|            | 40                                    | 60           | 80           | 100          | 120          |
| C12:0      | 0.43 ± 0.01                           | 0.59 ± 0.02  | 0.54 ± 0.03  | 0.45 ± 0.03  | 0.59 ± 0.01  |
| C14:0      | 2.03 ± 0.07                           | 2.15 ± 0.21  | 2.83 ± 0.08  | 2.95 ± 0.11  | 3.44 ± 0.17  |
| C15:0      | 5.22 ± 0.34                           | 3.69 ± 0.25  | 8.13 ± 0.39  | 5.29 ± 0.19  | 8.87 ± 0.27  |
| C16:0      | 31.22 ± 1.54                          | 31.06 ± 1.87 | 32 ± 2.33    | 34.25 ± 1.65 | 33.73 ± 0.77 |
| C17:0      | 1.11 ± 0.02                           | 1.31 ± 0.22  | 2.1 ± 0.13   | 1.47 ± 0.1   | 1.91 ± 0.09  |
| C18:0      | 2.67 ± 0.22                           | 3.36 ± 0.2   | 2.13 ± 0.33  | 2.21 ± 0.02  | 1.67 ± 0.06  |
| C20:4n-6   | 0.55 ± 0.01                           | 0.69 ± 0.02  | 0.68 ± 0.03  | 0.63 ± 0.01  | 0.75 ± 0.02  |
| C20:5n-3   | 2.77 ± 0.03                           | 2.82 ± 0.05  | 3.16 ± 0.06  | 2.61 ± 0.11  | 3.22 ± 0.09  |
| C22:5n-3   | 7.56 ± 0.72                           | 8.82 ± 0.17  | 7.95 ± 0.33  | 8.48 ± 0.56  | 7.37 ± 0.44  |
| C22:6n-3   | 37.22 ± 2.44                          | 39.13 ± 1.78 | 35.99 ± 1.25 | 37.4 ± 2.1   | 35.59 ± 1.23 |
| SFA        | 42.65 ± 3.2                           | 42.18 ± 2.67 | 47.76 ± 3.31 | 46.64 ± 2.9  | 49.64 ± 1.89 |
| PUFA       | 48.12 ± 1.69                          | 51.48 ± 2.78 | 47.79 ± 2.55 | 49.13 ± 1.08 | 46.95 ± 1.17 |

Data are expressed as mean ± SD of triplicate experiments. The values (mean ± SD) represent the percent of TFA. SFA and PUFA are acronyms for saturated fatty acids and polyunsaturated fatty acids, respectively. Lipids were extracted at the end of the fermentation.

**Table S3.** Fatty acid composition of lipids accumulated during the cultivation of PKU#Mn4 strain in different concentrations of glucose.

| Fatty acid | Glucose (g/L) |              |              |              |              |
|------------|---------------|--------------|--------------|--------------|--------------|
|            | 10            | 20           | 30           | 40           | 50           |
| C12:0      | 0.34 ± 0.02   | 0.12 ± 0.01  | 0.28 ± 0.01  | 0.51 ± 0.02  | 0.21 ± 0.02  |
| C14:0      | 5.87 ± 0.16   | 4.37 ± 0.22  | 5.54 ± 0.91  | 7.25 ± 0.65  | 3.38 ± 0.05  |
| C15:0      | 0.99 ± 0.65   | 1.77 ± 0.1   | 1.67 ± 0.01  | 0.63 ± 0.04  | 0.59 ± 0.03  |
| C16:0      | 36.19 ± 3.71  | 40.66 ± 2.63 | 41.12 ± 3.06 | 40.33 ± 2.92 | 31.88 ± 2.83 |
| C17:0      | 0.02 ± 0      | 0.05 ± 0     | 0.11 ± 0.01  | 0.03 ± 0     | 0.01 ± 0     |
| C18:0      | 0.63 ± 0.08   | 0.79 ± 0.06  | 1.35 ± 0.08  | 0.97 ± 0.03  | 1.03 ± 0.01  |
| C20:4n-6   | 0.24 ± 0.02   | 0.44 ± 0.01  | 0.12 ± 0.01  | 0.1 ± 0      | 0.28 ± 0.02  |
| C20:5n-3   | 0.47 ± 0.01   | 0.32 ± 0.02  | 0.25 ± 0.01  | 0.49 ± 0.02  | 0.39 ± 0.02  |
| C22:5n-3   | 7.74 ± 0.04   | 6.79 ± 0.12  | 6.23 ± 0.09  | 4.22 ± 0.13  | 4.48 ± 0.24  |
| C22:6n-3   | 43.26 ± 3.78  | 41.98 ± 3.22 | 37.6 ± 4.73  | 39.05 ± 3.97 | 40.11 ± 4.61 |
| SFA        | 44.09 ± 3.67  | 47.73 ± 2.79 | 50.07 ± 4.55 | 49.72 ± 2.92 | 37.15 ± 3.37 |
| PUFA       | 51.64 ± 2.49  | 49.5 ± 3.65  | 44.23 ± 2.44 | 43.84 ± 1.73 | 45.22 ± 1.46 |

Data are expressed as mean ± SD of triplicate experiments. The values represent the percent of total fatty acids. SFA and PUFA are acronyms for saturated fatty acids and polyunsaturated fatty acids, respectively. Lipids were extracted at the end of the fermentation.

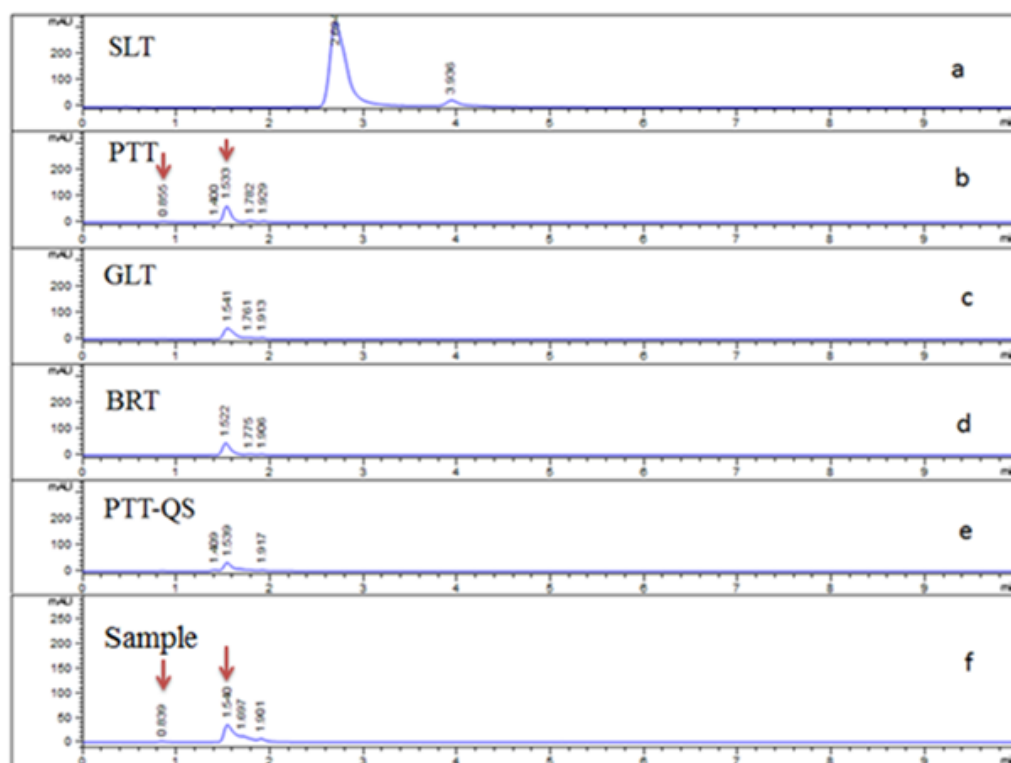

**Figure S1.** HPLC analysis of monosaccharide standard solution. (a) Rhamnose, (b) Glucose, (c) Mannose, (d) Galactose, (e) Glucuronic acid, and (f) *Enteromorpha* hydrolysate.
